# Supplementary material for: PrimAlign: PageRank-inspired Markovian alignment for large biological networks
Source: Oxford University Press journal article supplement (doi:10.1093/bioinformatics/bty288), 2018-04-12
Supplement: bioinformatics_34_13_i537_s1.pdf [file bioinformatics_34_13_i537_s1.pdf]

Supplementary Figure 1: PrimAlign processing flow diagram

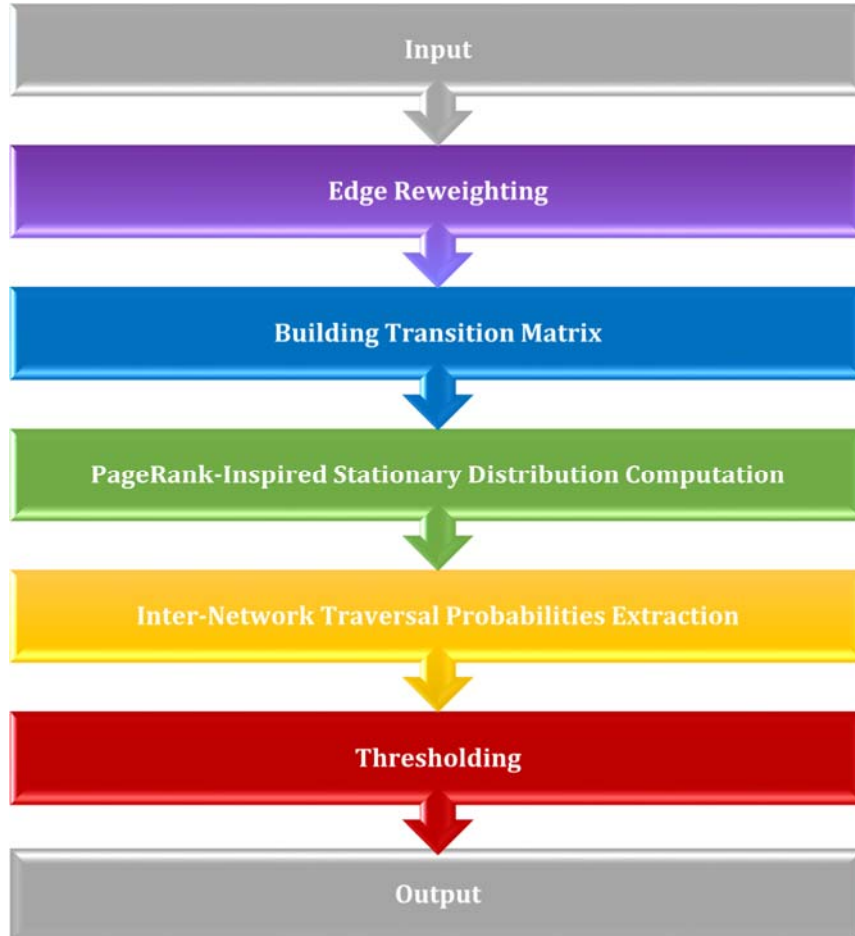

## Supplementary Text 1: Program input and file formats

The program signature is:

```
PrimAlign.exe networkFile1 networkFile2 internetworkFile outputFile [threshold]
```

Arguments:

networkFile1: path to file with protein-protein interactions defining the 1<sup>st</sup> network  
networkFile2: path to file with protein-protein interactions defining the 2<sup>nd</sup> network  
internetworkFile: path to file with sequence similarities between proteins of both networks  
outputFile: path where to write probable orthologous protein pairs  
threshold: cut-off threshold for candidate orthologs, optional (default value 0.75)

File format: All files are in tab-delimited format with each protein pair on a separate line.

Network files:

Interaction weight is optional. It can be a semantic similarity, for example.

```
ProteinA      ProteinB      [interaction weight A-B]  
ProteinA      ProteinC      [interaction weight A-C]  
ProteinD      ProteinB      [interaction weight D-B]  
...
```

Internetwork file:

Sequence similarity is required, should be either BLAST bit-score or  $-\log(\text{BLAST e-value})$ .  
Proteins from the 1<sup>st</sup> network should be in the 1<sup>st</sup> column.

```
Protein1A     Protein2A     (sequence similarity 1A-2A)  
Protein1B     Protein2C     (sequence similarity 1B-2C)  
Protein1D     Protein2B     (sequence similarity 1D-2B)  
...
```

Output file:

Selected ortholog candidates are sorted according to their quality (top pair first).

```
Protein1K     Protein2C     (score 1K-2C)  
Protein1I     Protein2M     (score 1I-2M)  
Protein1D     Protein2J     (score 1D-2J)  
...
```

## Supplementary Figures 2: Effect of changing program constants

When building the edge reweighting method, various transformations were tried, including linear, logarithmic, and exponential transformations. A positive effect was apparent only for polynomial exponentiation. The results for various exponents and selected evaluation measures are depicted in the figure below. Number 3 was selected as a reasonable exponent.

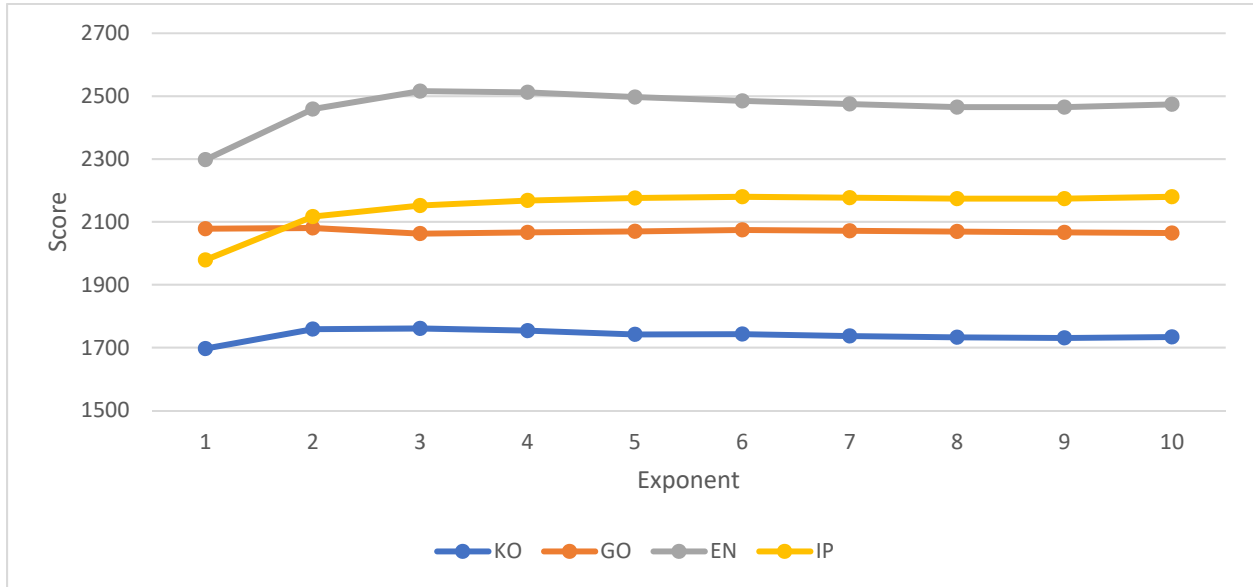

How different settings of the damping factor affected the results is shown in the figure below. The effect is obvious immediately when  $\alpha < 1$ , as the evaluation measures increase. In concordance with the original PageRank algorithm, the value of 0.85 was selected as an appropriate damping factor.

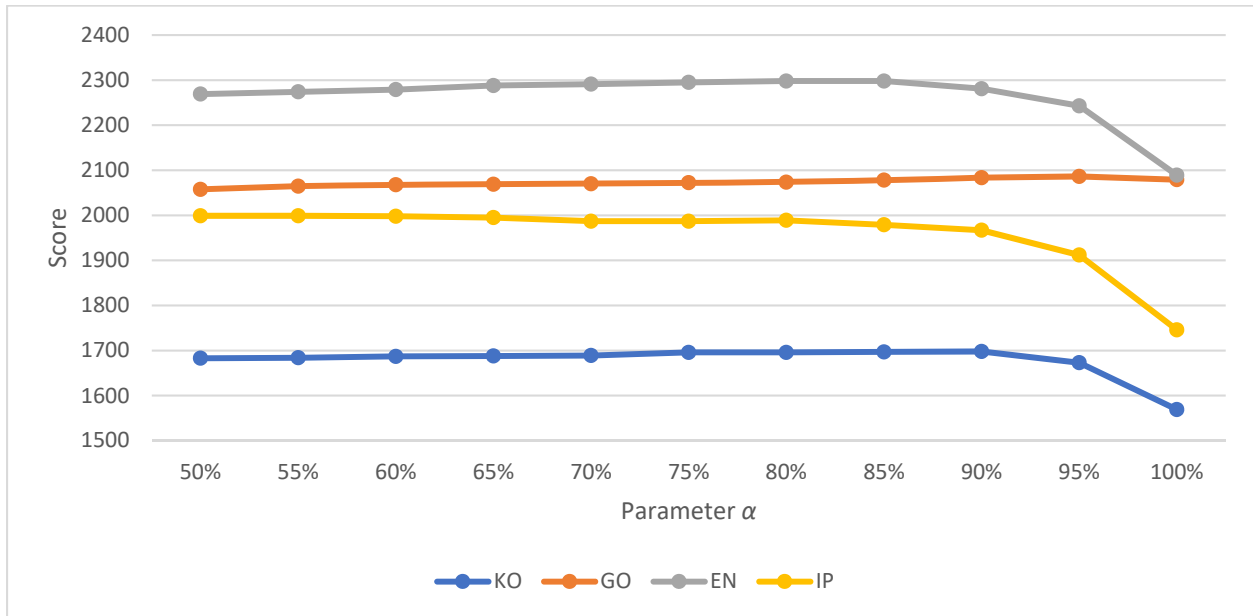



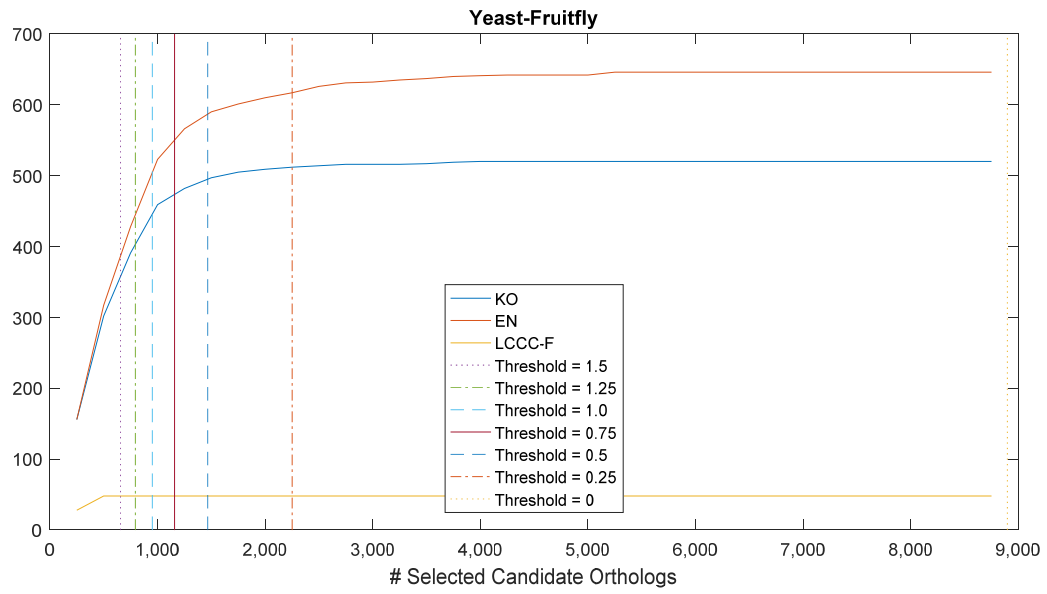

**Supplementary Table 1a: Alignment overview for human-fruit fly alignment**

| <b>Aligner</b> | <b>Weighted</b> | <b>AP</b> | <b>Cov</b> | <b>CE</b> | <b>LCCC</b> | <b>cKO</b> | <b>cGO</b> | <b>cEN</b> | <b>cIP</b> |
|----------------|-----------------|-----------|------------|-----------|-------------|------------|------------|------------|------------|
| AlignMCL       | No              | 4486      | 5329       | 4289      | 978         | 4.51       | 4.22       | 3.58       | 6.09       |
| AlignMCL       | Yes             | 4483      | 5325       | 4289      | 978         | 4.51       | 4.22       | 3.58       | 6.09       |
| AlignNemo      | No              | 890       | 911        | 471       | 90          | 3.46       | 3.86       | 3.27       | 4.32       |
| AlignNemo      | Yes             | 761       | 796        | 456       | 89          | 3.28       | 3.82       | 3.21       | 4.09       |
| CUFID          | No              | 1835      | 3670       | 1834      | 805         | 2.60       | 4.11       | 2.24       | 2.95       |
| CUFID          | Yes             | 1827      | 3654       | 1896      | 793         | 2.53       | 3.85       | 2.19       | 2.90       |
| HubAlign       | No              | 1124      | 2248       | 982       | 305         | 16.53      | 6.44       | 15.61      | 17.84      |
| IsoRankN       | No              | 0         | 0          | 0         | 0           | NA         | NA         | NA         | NA         |
| MAGNA++        | No              | 2120      | 4240       | 764       | 204         | 5.06       | 5.45       | 4.39       | 6.22       |
| MI-GRAAL       | No              | NA        | NA         | NA        | NA          | NA         | NA         | NA         | NA         |
| NETAL          | No              | 177       | 354        | 2         | 1           | $\infty$   | 7.58       | $\infty$   | $\infty$   |
| NetCoffee      | No              | 282       | 564        | 140       | 18          | 2.12       | 3.08       | 2.14       | 2.45       |
| NetworkBLAST   | No              | 633       | 652        | 235       | 32          | 4.83       | 4.02       | 4.55       | 5.60       |
| NetworkBLAST   | Yes             | 105       | 145        | 16        | 3           | 4.77       | 3.93       | 4.57       | 5.83       |
| PINALOG        | No              | 945       | 1890       | 978       | 305         | 3.99       | 4.67       | 3.95       | 4.33       |
| PrimAlign      | No              | 2761      | 3342       | 4289      | 1097        | 2.58       | 3.67       | 2.10       | 3.62       |
| PrimAlign      | Yes             | 2762      | 3325       | 4371      | 1080        | 2.56       | 3.65       | 2.11       | 3.63       |
| SANA           | No              | 2120      | 4240       | 1118      | 251         | 5.65       | 5.35       | 4.24       | 6.95       |
| SMETANA        | No              | 2254      | 3295       | 2409      | 780         | 2.79       | 3.73       | 2.27       | 3.52       |
| SMETANA        | Yes             | 2298      | 3378       | 2364      | 780         | 2.68       | 3.74       | 2.24       | 3.46       |
| WAVE           | No              | 2120      | 4240       | 1734      | 672         | 3.67       | 4.46       | 2.99       | 4.14       |

**Supplementary Table 1b: Alignment overview for yeast-fruit fly alignment**

| <b>Aligner</b> | <b>Weighted</b> | <b>AP</b> | <b>Cov</b> | <b>CE</b> | <b>LCCC</b> | <b>cKO</b> | <b>cGO</b> | <b>cEN</b> | <b>cIP</b> |
|----------------|-----------------|-----------|------------|-----------|-------------|------------|------------|------------|------------|
| AlignMCL       | 4486            | 1474      | 2006       | 928       | 139         | 3.43       | 3.20       | 3.00       | 4.22       |
| AlignMCL       | 4483            | 1474      | 2006       | 928       | 139         | 3.43       | 3.20       | 3.00       | 4.22       |
| AlignNemo      | 890             | 352       | 383        | 175       | 32          | 2.77       | 3.08       | 2.86       | 3.56       |
| AlignNemo      | 761             | 314       | 338        | 181       | 32          | 3.11       | 3.05       | 3.11       | 3.61       |
| CUFID          | 1835            | 1223      | 2446       | 674       | 77          | 3.18       | 3.53       | 2.86       | 3.56       |
| CUFID          | 1827            | 1306      | 2612       | 1144      | 192         | 3.22       | 3.30       | 2.95       | 3.61       |
| HubAlign       | 1124            | 1124      | 2248       | 1410      | 231         | 2.28       | 2.74       | 2.43       | 2.96       |
| IsoRankN       | 0               | 0         | 0          | 0         | 0           | NaN        | NaN        | NaN        | NaN        |
| MAGNA++        | 2120            | 2120      | 4240       | 870       | 171         | 6.09       | 4.82       | 5.44       | 7.07       |
| MI-GRAAL       | No              | NA        | NA         | NA        | NA          | NA         | NA         | NA         | NA         |
| NETAL          | No              | 386       | 772        | 20        | 2           | $\infty$   | 6.50       | $\infty$   | $\infty$   |
| NetCoffee      | No              | 237       | 474        | 114       | 16          | 2.12       | 2.54       | 2.39       | 2.58       |
| NetworkBLAST   | No              | 241       | 272        | 67        | 8           | 4.55       | 3.50       | 4.46       | 5.13       |
| NetworkBLAST   | Yes             | 0         | 0          | 0         | 0           | NaN        | NaN        | NaN        | NaN        |
| PINALOG        | No              | 928       | 1856       | 1070      | 209         | 3.02       | 3.24       | 3.01       | 3.58       |
| PrimAlign      | No              | 1150      | 1547       | 919       | 275         | 2.41       | 2.94       | 2.09       | 3.08       |
| PrimAlign      | Yes             | 1159      | 1532       | 932       | 282         | 2.45       | 2.93       | 2.10       | 3.12       |
| SANA           | No              | 2119      | 4238       | 1344      | 199         | 3.89       | 3.91       | 4.13       | 5.06       |
| SMETANA        | No              | 1124      | 1763       | 764       | 102         | 2.80       | 3.06       | 2.52       | 3.43       |
| SMETANA        | Yes             | 1173      | 1794       | 759       | 99          | 2.93       | 3.08       | 2.57       | 3.54       |
| WAVE           | No              | 2120      | 4240       | 1680      | 525         | 4.22       | 4.00       | 3.96       | 5.11       |

Supplementary Figure 4a: Results of human-yeast alignment

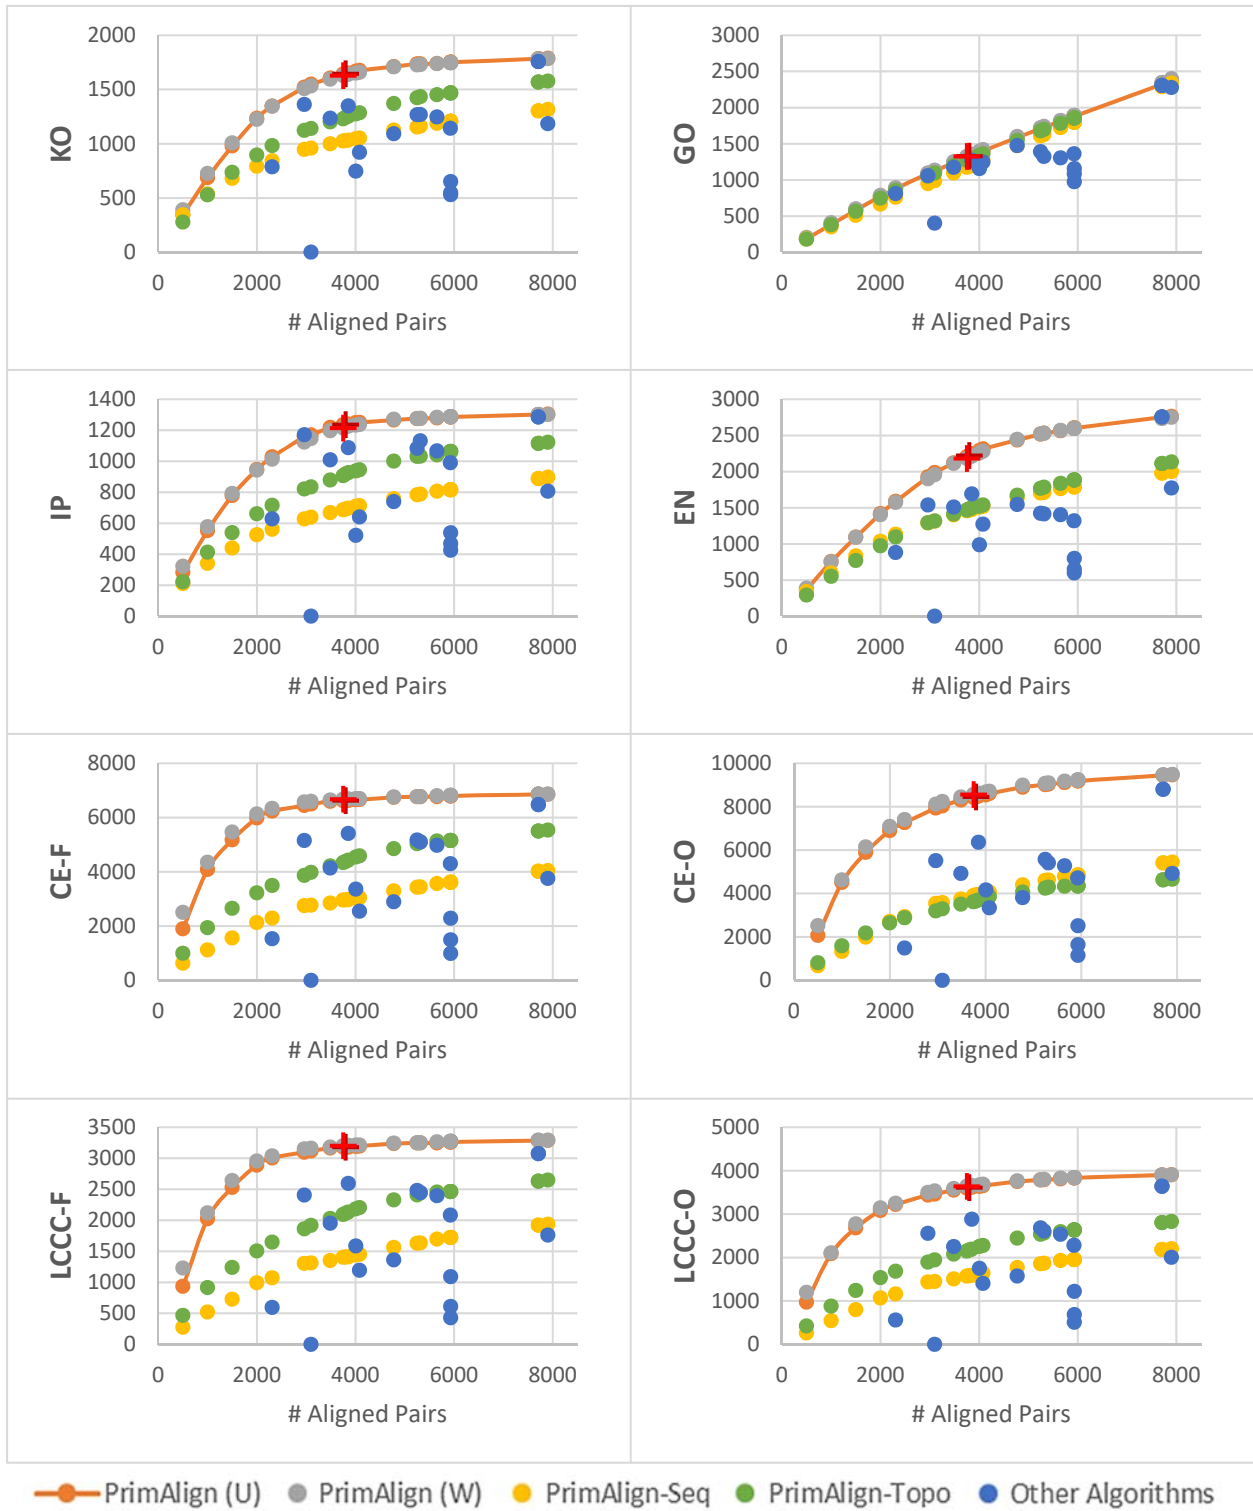



Supplementary Figure 4b: Results of human-fly alignment

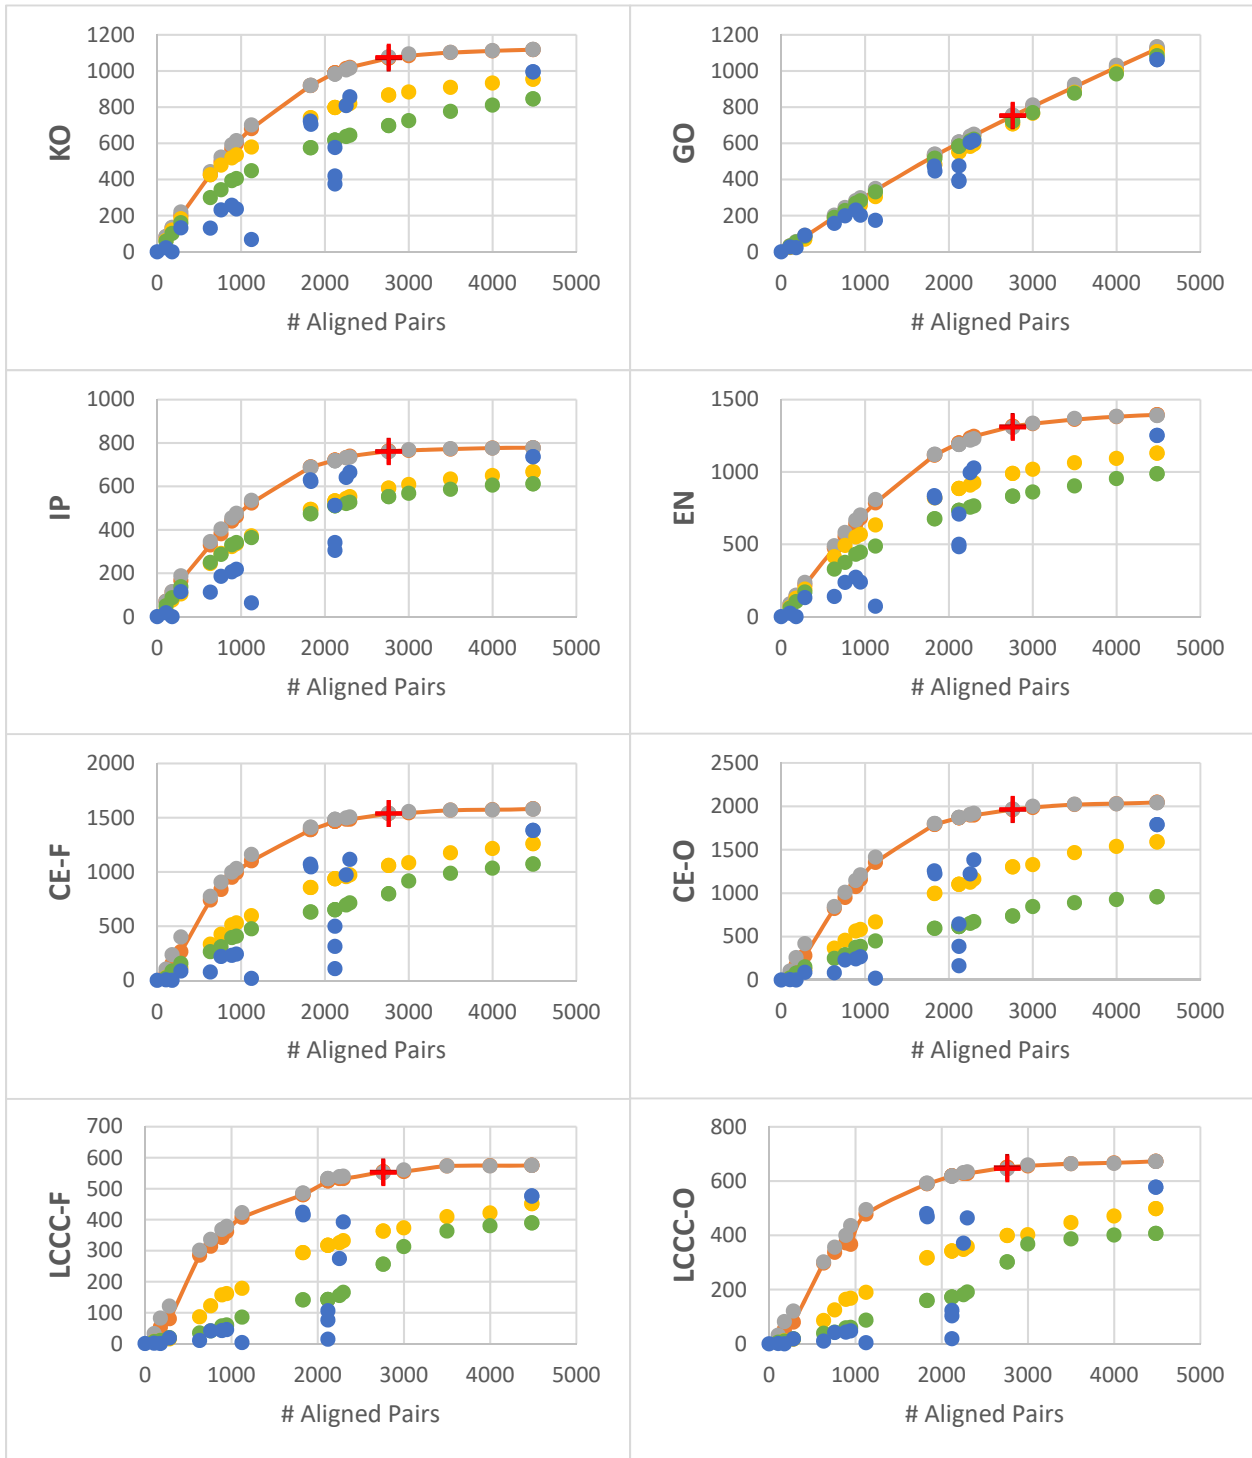

—●— PrimAlign (U)  
 ● PrimAlign (W)  
 ● PrimAlign-Seq  
 ● PrimAlign-Topo  
 ● Other Algorithms

Supplementary Figure 4c: Results of yeast-fruit fly Alignment

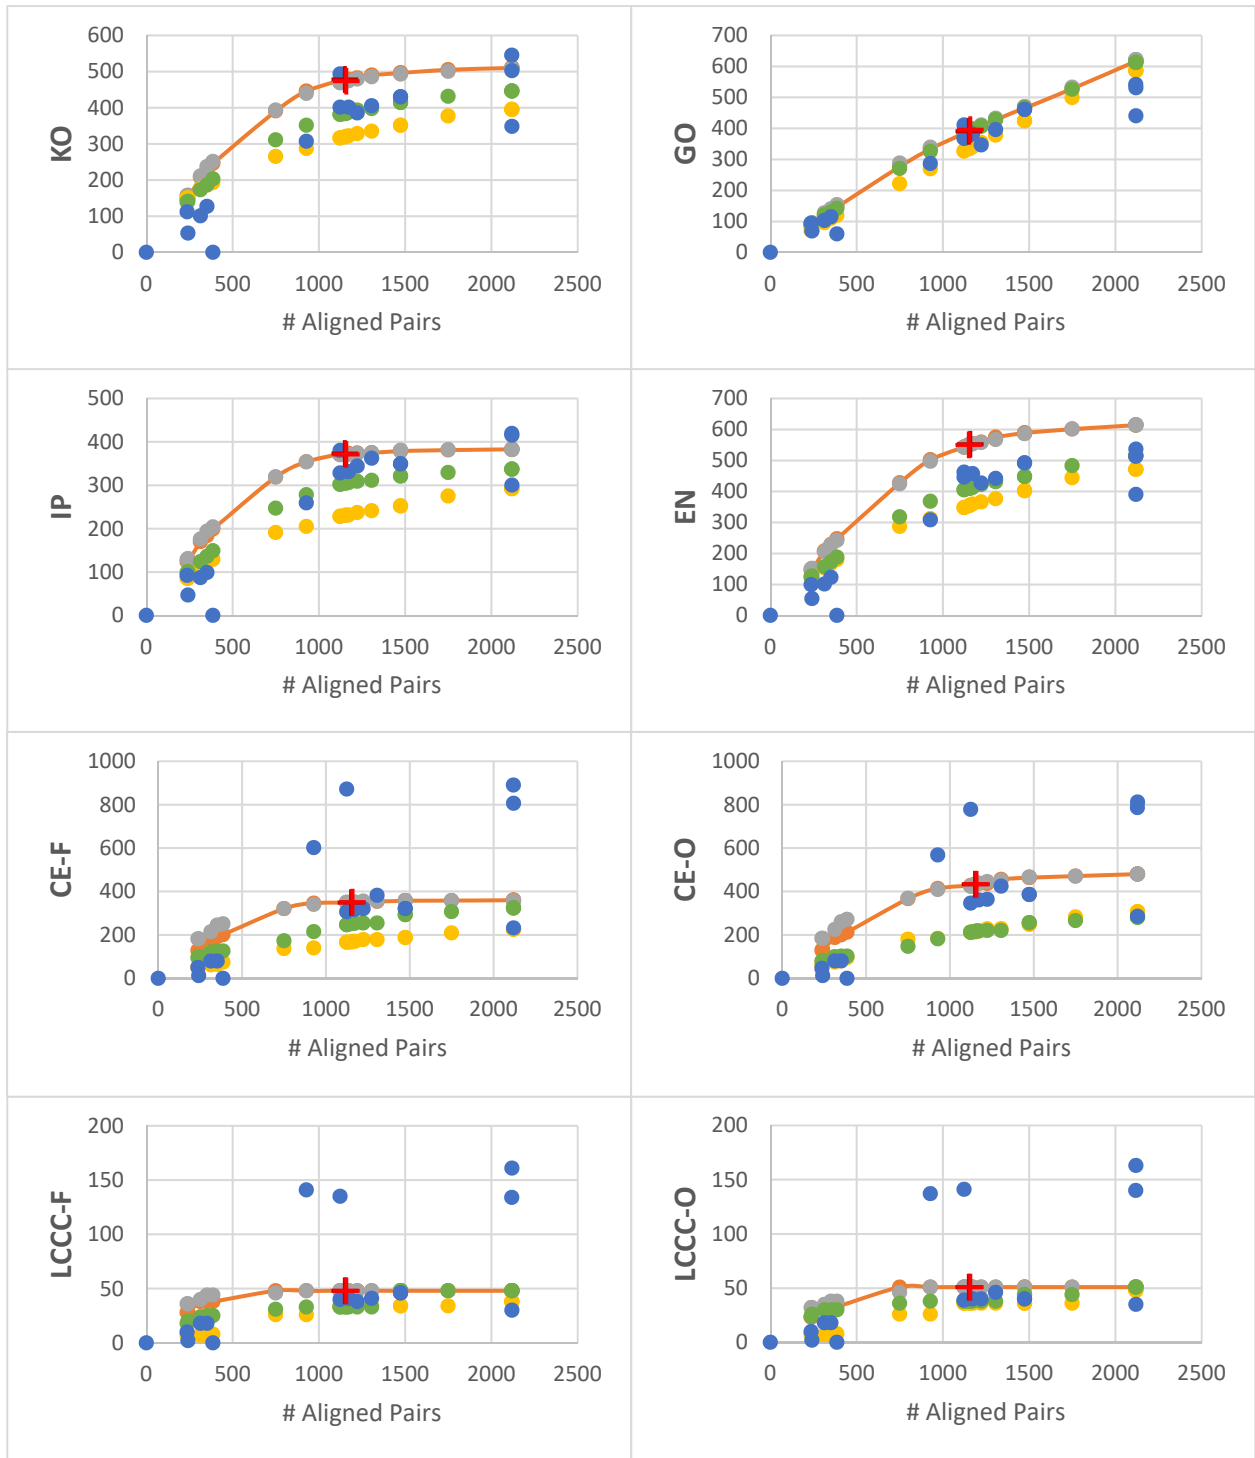

—●— PrimAlign (U)   ● PrimAlign (W)   ● PrimAlign-Seq   ● PrimAlign-Topo   ● Other Algorithms



**Supplementary Table 2b: Statistical comparison of PrimAlign with others in yeast-fruit fly alignment**

| Algorithm    | Weighted | KO  | GO  | EN  | IP  | CE-F | CE-H | LCCC-F | LCCC-H |
|--------------|----------|-----|-----|-----|-----|------|------|--------|--------|
| AlignMLC     | N        | **  |     | *** |     |      | **   |        |        |
| AlignMLC     | Y        | **  |     | *** |     |      | **   |        |        |
| AlignNemo    | N        | *** | **  | *** | *** | ***  | ***  | **     | *      |
| AlignNemo    | Y        | *** | **  | *** | *** | ***  | ***  | **     | *      |
| CUFID        | N        | *** | *** | *** |     |      | **   |        |        |
| CUFID        | Y        | *** | **  | *** |     |      |      |        |        |
| HubAlign     | N        |     | *   | *** |     | ***  | ***  | ***    | ***    |
| IsoRankN     | N        | NA  | NA  | NA  | NA  | NA   | NA   | NA     | NA     |
| MAGNA++      | N        | *** | *** | *** | *** | ***  | ***  | *      |        |
| MI-GRAAL     | N        | NA  | NA  | NA  | NA  | NA   | NA   | NA     | NA     |
| NETAL        | N        | *** | *** | *** | *** | ***  | ***  | ***    | ***    |
| NetCoffee    | N        | **  |     | *** | **  | ***  | ***  | **     | *      |
| NetworkBLAST | N        | *** | *** | *** | *** | ***  | ***  | ***    | ***    |
| NetworkBLAST | Y        | NA  | NA  | NA  | NA  | NA   | NA   | NA     | NA     |
| PINALOG      | N        | *** | *** | *** | *** | ***  | ***  | ***    | ***    |
| SANA         | N        |     | *** | *** |     | ***  | ***  | ***    | ***    |
| SMETANA      | N        | **  |     | *** |     |      | **   |        |        |
| SMETANA      | Y        | **  |     | *** | *   |      | **   |        |        |
| WAVE         | N        |     | *** | **  |     | ***  | ***  | ***    | ***    |

**Supplementary Table 3: Running time**

| Algorithm    | Weighted | RunTime [s] |       |              | RunTime Ratio |           |
|--------------|----------|-------------|-------|--------------|---------------|-----------|
|              |          | h-y         | h-f   | y-f          | h-y / h-f     | h-f / y-f |
| NetCoffee    | N        | 4           | 3     | 2            | 1.3           | 1.5       |
| PrimAlign    | Y        | 21          | 12    | 2            | 1.8           | 6.0       |
| PrimAlign    | N        | 22          | 13    | 2            | 1.7           | 6.5       |
| CUFID        | N        | 321         | 259   | 38           | 1.2           | 6.8       |
| SMETANA      | N        | 337         | 275   | 41           | 1.2           | 6.7       |
| CUFID        | Y        | 377         | 310   | 45           | 1.2           | 6.9       |
| SMETANA      | Y        | 382         | 320   | 47           | 1.2           | 6.8       |
| AlignMCL     | N        | 558         | 73    | 11           | 7.6           | 6.6       |
| AlignMCL     | Y        | 569         | 68    | 11           | 8.4           | 6.2       |
| WAVE         | N        | 666         | 68    | 30           | 9.8           | 2.3       |
| HubAlign     | N        | 721         | 31    | 12           | 23.3          | 2.6       |
| SANA         | N        | 942         | 632   | 401          | 1.5           | 1.6       |
| AlignNemo    | N        | 1454        | 27    | 5            | 53.9          | 5.4       |
| AlignNemo    | Y        | 1848        | 27    | 5            | 68.4          | 5.4       |
| NETAL        | N        | 2649        | 246   | 74           | 10.8          | 3.3       |
| PINALOG      | N        | 17346       | 31674 | 2261         | 0.5           | 14.0      |
| MAGNA++      | N        | 39131       | 28833 | 8883         | 1.4           | 3.2       |
| NetworkBLAST | Y        | 122217      | 418   | 57           | 292.4         | 7.3       |
| NetworkBLAST | N        | 125480      | 509   | 70           | 246.5         | 7.3       |
| IsoRankN     | N        | 348070      | 11546 | 3813         | 30.1          | 3.0       |
| MI-GRAAL     | N        | N/A         | N/A   | est >1198379 | N/A           | N/A       |
